# Supplementary material for: Cnicin as an Anti-SARS-CoV-2: An Integrated In Silico and In Vitro Approach for the Rapid Identification of Potential COVID-19 Therapeutics
Source: MDPI journal article supplement (doi:10.3390/antibiotics10050542), 2021-05-07
Supplement: s1 [file s1]

# Cnicin as an Anti-SARS-CoV-2: An Integrated in Silico and in Vitro Approach for the Rapid Identification of Potential COVID-19 Therapeutics

Hani A. Alhadrami <sup>1,2,†</sup>, Ahmed M. Sayed <sup>3,†</sup>, Hossam M. Hassan <sup>3,4</sup>, Khayrya A. Youssif <sup>5</sup>, Yasser Gaber <sup>6,7</sup>, Yassmin Moatasim <sup>8</sup>, Omnia Kutkat <sup>8</sup>, Ahmed Mostafa <sup>8</sup>, Mohamed Ahmed Ali <sup>8</sup>, Mostafa E. Rateb <sup>9,†</sup>, Usama Ramadan Abdelmohsen <sup>10,11,\*</sup> and Noha M. Gamaleldin <sup>12,\*</sup>

<sup>1</sup> Department of Medical Laboratory Technology, Faculty of Applied Medical Sciences, King Abdulaziz University, P.O. BOX 80402, Jeddah 21589, Saudi Arabia; hani.alhadrami@kau.edu.sa

<sup>2</sup> Molecular Diagnostic Lab, King Abdulaziz University Hospital, King Abdulaziz University, P.O. BOX 80402, Jeddah 21589, Saudi Arabia

<sup>3</sup> Department of Pharmacognosy, Faculty of Pharmacy, Nahda University, Beni-Suef 62513, Egypt; Ahmed.mohamed.sayed@nub.edu.eg (A.M.S.); hossam.mokhtar@nub.edu.eg (H.M.H.)

<sup>4</sup> Department of Pharmacognosy, Faculty of Pharmacy, Beni-Suef University, Beni-Suef 62513, Egypt; hossam.mokhtar@nub.edu.eg

<sup>5</sup> Department of Pharmacognosy, Faculty of Pharmacy, Modern University for Technology and Information, Cairo 11865, Egypt; khayrya.youssif@gmail.com

<sup>6</sup> Department of Microbiology and Immunology, Faculty of Pharmacy, Beni-Suef University, Beni-Suef 62511, Egypt; yasser.gaber@pharm.bsu.edu.eg

<sup>7</sup> Department of Pharmaceutics and Pharmaceutical Technology, Faculty of Pharmacy, Mutah University, Karak 61710, Jordan

<sup>8</sup> Center of Scientific Excellence for Influenza Virus, Environmental Research Division, National Research Centre, Giza 12622, Egypt; Yasmin.Moatasim@human-link.org (Y.M.); Omnia.Abdelaziz@human-link.org (O.K.); ahmed\_elsayed@daad-alumni.de (A.M.); mohamedahmedali2004@yahoo.com (M.A.A.)

<sup>9</sup> School of Computing, Engineering & Physical Sciences, University of the West of Scotland, Paisley PA1 2BE, UK; [Mostafa.Rateb@uws.ac.uk](mailto:Mostafa.Rateb@uws.ac.uk)

<sup>10</sup> Department of Pharmacognosy, Faculty of Pharmacy, Deraya University, New Minia 61111, Egypt

<sup>11</sup> Department of Pharmacognosy, Faculty of Pharmacy, Minia University, Minia 61519, Egypt

<sup>12</sup> Department of Microbiology, Faculty of Pharmacy, The British University in Egypt (BUE), Cairo 11837, Egypt

† These authors contributed equally to this work.

\* Correspondence: usama.ramadan@mu.edu.eg (U.R.A.); noha.gamaleldin@bue.edu.eg (N.M.G.)

**Table S1.** All SARS CoV-2-related proteins used in this study.

| Protein                                        | Name                   | Function                                                                                                             | PDB Code                       | Docking box co-ordinates          |
|------------------------------------------------|------------------------|----------------------------------------------------------------------------------------------------------------------|--------------------------------|-----------------------------------|
| <b>Viral Proteins (Nonstructural proteins)</b> |                        |                                                                                                                      |                                |                                   |
| nsp1*                                          | -                      | Host translation inhibitor                                                                                           | 7K3N                           | -                                 |
| nsp2*                                          | -                      | Play a role in the modulation of host cell survival signaling pathway by interacting with host PHB and PHB2          | Deposited model in Swiss-Model | -                                 |
| nsp3                                           | ADP ribose phosphatase | Activate replicase polyprotein                                                                                       | 6W02                           | X= -0.66<br>Y= -8.97<br>Z= -22.42 |
| nsp4*                                          | -                      | Participates in the assembly of virally-induced cytoplasmic double-membrane vesicles necessary for viral replication | Deposited model in Swiss-Model | -                                 |
| nsp5 (3CL-Pro)                                 | Main protease          | Cleaves the C-terminus of replicase polyprotein at 11 sites                                                          | 6lu7                           | X= 12.87<br>Y= 16.13<br>Z= 68.64  |
| nsp6*                                          | -                      | Plays a role in the initial induction of autophagosomes                                                              | Deposited model in Swiss-Model | -                                 |
| nsp7*                                          | -                      | Plays a role in viral RNA synthesis                                                                                  | 6M5I                           | -                                 |
| nsp8*                                          | -                      | Plays a role in viral RNA synthesis                                                                                  | 6M5I                           | -                                 |
| nsp9*                                          | -                      | May participate in viral replication by acting as a ssRNA-binding protein                                            | 6WC1                           | -                                 |

|                                             |                                    |                                                                                                                                                                                                               |                                |                                     |
|---------------------------------------------|------------------------------------|---------------------------------------------------------------------------------------------------------------------------------------------------------------------------------------------------------------|--------------------------------|-------------------------------------|
| nsp10*                                      | -                                  | plays an essential role in viral mRNAs cap methylation                                                                                                                                                        | 6ZPE                           | -                                   |
| nsp11 (PL-Pro)                              | Papain-like protease               | Participate in the activation of the replicase polyprotein                                                                                                                                                    | 6WX4                           | X= 10.81<br>Y= -28.52<br>Z= -41.4   |
| nsp12 (Pol; RdRP)                           | RNA-directed RNA polymerase        | Responsible for replication and transcription of the viral RNA genome                                                                                                                                         | 6XEZ                           | X= 139.42<br>Y= 201.96<br>Z= 135.29 |
| nsp13 (Hel)                                 | Helicase                           | Displaying RNA and DNA duplex-unwinding activities with 5' to 3' polarity. Activity of helicase is dependent on magnesium                                                                                     | 6XEZ                           | X= 139.42<br>Y= 201.96<br>Z= 135.29 |
| nsp14 (ExoN)*                               | Proofreading exoribonuclease       | An exoribonuclease activity acting on both ssRNA and dsRNA in a 3' to 5' direction                                                                                                                            | Deposited model in Swiss-Model | -                                   |
| Nsp15 (NendoU)                              | Uridylate-specific exoribonuclease | Mn(2+)-dependent, uridylate-specific enzyme, which leaves 2'-3'-cyclic phosphates 5' to the cleaved bond.                                                                                                     | 5S6X                           | X= 64.14<br>Y= -71.5<br>Z= 25.29    |
| nsp16                                       | 2'-O-methyltransferase             | Methyltransferase that mediates mRNA cap 2'-O-ribose methylation to the 5'-cap structure of viral mRNAs                                                                                                       | 6W4H                           | X= 84.62<br>Y= 15.56<br>Z= 26.39    |
| <b>Viral Proteins (Structural Proteins)</b> |                                    |                                                                                                                                                                                                               |                                |                                     |
| S glycoprotein                              | Spike glycoprotein                 | Binding to human ACE2 receptor and internalization of the virus into the endosomes of the host cell induces conformational changes in the Spike glycoprotein                                                  | 6lzg                           | X= -36.69<br>Y= 39.28<br>Z= 14.30   |
| E-protein                                   | Envelope small membrane protein    | Plays a central role in virus morphogenesis and assembly                                                                                                                                                      | 7k3g                           | X= 10.13<br>Y= 0.12<br>Z= 0.71      |
| M-protein*                                  | Membrane protein                   | Component of the viral envelope that plays a central role in virus morphogenesis and assembly via its interactions with other viral proteins                                                                  | Deposited model in Swiss-Model | -                                   |
| N-protein*                                  | Nucleoprotein                      | Packages the positive strand viral genome RNA into a helical ribonucleocapsid (RNP) and plays a fundamental role during virion assembly through its interactions with the viral genome and membrane protein M | 6M3M                           | -                                   |
| <b>Viral proteins (Accessory Proteins)</b>  |                                    |                                                                                                                                                                                                               |                                |                                     |
| ORF3a*                                      | ORF3a protein                      | Forms homotetrameric potassium sensitive ion channels (viroporin) and may modulate virus release                                                                                                              | 6XDC                           | -                                   |
| ORF6*                                       | ORF6 protein                       | Disrupts cell nuclear import complex formation by tethering karyopherin alpha 2 and karyopherin beta 1 to the membrane                                                                                        | Deposited model in Swiss-Model | -                                   |
| ORF7a*                                      | ORF7a protein                      | Plays a role as antagonist of host tetherin (BST2), disrupting its antiviral effect                                                                                                                           | 6W37                           | -                                   |
| ORF7b                                       | ORF7b protein                      | -                                                                                                                                                                                                             | -                              | -                                   |
| ORF8*                                       | ORF8 protein                       | May play a role in host-virus interaction                                                                                                                                                                     | 7JTL                           | -                                   |
| ORF9b                                       | ORF9b protein                      | Plays a role in the inhibition of host innate immune response by targeting the mitochondrial-associated adapter MAVS                                                                                          | 6Z4U                           | X= 10.24<br>Y= -2.84<br>Z= -1.89    |
| <b>Human-derived Proteins</b>               |                                    |                                                                                                                                                                                                               |                                |                                     |
| ACE2                                        | Angiotensin converting enzyme 2    | Responsible for attachment of SARS CoV                                                                                                                                                                        | 6LZG                           | X= -30.8<br>Y= 12.73<br>Z= -3.63    |
| Furin                                       | Furin                              | Activation of S-protein                                                                                                                                                                                       | 6EQX                           | X= 43.99<br>Y= -39.11<br>Z= -5.55   |
| TMPRSS2*                                    | Transmembrane protease, serine 2   | Activation of S-protein                                                                                                                                                                                       | Deposited model in Swiss-Model | -                                   |
| CatL                                        | Cathepsin L                        | Activation of S-protein                                                                                                                                                                                       | 2YJC                           | X= 8.92<br>Y= 36.19<br>Z= 19.45     |
| NPR1                                        | Neuropilin 1                       | Facilitates viral entry                                                                                                                                                                                       | 3I97                           | X= 0.21                             |

|       |                                     |                                                                                                                                                                                                                                                                 |  |  |                                           |
|-------|-------------------------------------|-----------------------------------------------------------------------------------------------------------------------------------------------------------------------------------------------------------------------------------------------------------------|--|--|-------------------------------------------|
|       |                                     |                                                                                                                                                                                                                                                                 |  |  | Y= -3.08<br>Z= -9.95                      |
| PHB1* | Prohibitin subunit1                 | In the mitochondria, together with PHB2, forms large ring complexes (prohibitin complexes) in the inner mitochondrial membrane (IMM) and functions as chaperone protein that stabilizes mitochondrial respiratory enzymes and maintains mitochondrial integrity |  |  | Deposited model in Swiss-Model<br>-       |
| PHB2* | Prohibitin subunit2                 | In the mitochondria, together with PHB2, forms large ring complexes (prohibitin complexes) in the inner mitochondrial membrane (IMM) and functions as chaperone protein that stabilizes mitochondrial respiratory enzymes and maintains mitochondrial integrity |  |  | Deposited model in Swiss-Model<br>-       |
| AAK1  | Adaptor Protein 2 Associated Kinase | Participate in viral endocytosis                                                                                                                                                                                                                                |  |  | 4WSQ<br>X= 8.44<br>Y= -13.38<br>Z= -52.35 |
| GAK   | Cyclin-G associated kinase          | Participate in viral endocytosis                                                                                                                                                                                                                                |  |  | 4y8d<br>X= 30.39<br>Y= 47.92<br>Z= -59.73 |

\*These protein structures are either calculated models (deposited in SWISS-model website) or have not co-crystallized ligand. In this case docking experiments were performed on all possible binding cavities on the protein. This was achieved by enclosing the whole protein inside the docking box during the preparation of docking experiments. .

**Table S2.** Compounds that got docking scores < -7 kcal/mol and were stable during the course of 25 ns molecular dynamic simulations (got an average RMSD < 5 Å).

| Viral proteins                  |               |              |               |              |               |              |               |              |               |              |
|---------------------------------|---------------|--------------|---------------|--------------|---------------|--------------|---------------|--------------|---------------|--------------|
| Compound                        | 3CL-Pro       |              | PL-Pro        |              | nsp3          |              | nsp12         |              | nsp15         |              |
|                                 | Docking score | Average RMSD |
| Cnicin                          | > -7          | > 5          | > -7          | > 5          | <b>-9.2</b>   | <b>2.08</b>  | <b>-9.7</b>   | <b>2.01</b>  | <b>-9.8</b>   | <b>2.2</b>   |
| Apigenin 7- <i>O</i> -glucoside | <b>-9.2</b>   | <b>1.9</b>   | <b>-8.6</b>   | <b>2.6</b>   | > -7          | > 5          | > -7          | > 5          | > -7          | > 5          |
| Astragalin                      | <b>-9.5</b>   | <b>2.1</b>   | <b>-8.3</b>   | <b>2.9</b>   | > -7          | > 5          | > -7          | > 5          | > -7          | > 5          |
| Arctiin                         | > -7          | > 5          | <b>-7.3</b>   | <b>3.9</b>   | > -7          | > 5          | > -7          | > 5          | > -7          | > 5          |
| Nortracheloside                 | > -7          | > 5          | <b>-7.1</b>   | <b>-3.5</b>  | > -7          | > 5          | > -7          | > 5          | > -7          | > 5          |
| Sitogluside*                    | > -7          | > 5          | > -7          | > 5          | > -7          | > 5          | > -7          | > 5          | > -7          | > 5          |
| Luteolin**                      | <b>-7.5</b>   | > 5          | <b>-7.1</b>   | > 5          | > -7          | > 5          | > -7          | > 5          | > -7          | > 5          |
| Non-viral proteins              |               |              |               |              |               |              |               |              |               |              |
|                                 | Cathepsin L   |              | NPR1          |              | AAK1          |              | GAK           |              |               |              |
|                                 | Docking score | Average RMSD |               |              |
| Cnicin                          | > -7          | > 5          | <b>-11.5</b>  | <b>1.44</b>  | <b>-9.1</b>   | <b>1.8</b>   | <b>-8.2</b>   | <b>2.4</b>   |               |              |
| Apigenin 7- <i>O</i> -glucoside | <b>-7.9</b>   | <b>3.4</b>   | > -7          | > 5          | > -7          | > 5          | > -7          | > 5          |               |              |
| Astragalin                      | <b>-8.1</b>   | <b>2.2</b>   | > -7          | > 5          | > -7          | > 5          | > -7          | > 5          |               |              |
| Arctiin                         | > -7          | > 5          | > -7          | > 5          | > -7          | > 5          | > -7          | > 5          |               |              |
| Nortracheloside                 | > -7          | > 5          | > -7          | > 5          | > -7          | > 5          | > -7          | > 5          |               |              |
| Sitogluside*                    | > -7          | > 5          | > -7          | > 5          | > -7          | > 5          | > -7          | > 5          |               |              |
| Luteolin**                      | <b>-7.0</b>   | > 5          | > -7          | > 5          | > -7          | > 5          | > -7          | > 5          |               |              |

\*This compounds achieved docking scores > -7 and unstable bindings (RMSD > 5 Å) with all proteins. \*\*This compound got docking score < -7 kcal/mol with some proteins, but was unstable upon molecular dynamic simulation (got RMSD > 5 Å). These two compounds (i.e. sitogluside and luteolin) were selected to validate our in-silico approach. They were inactive upon in-vitro viral inhibitory testing (got IC<sub>50</sub> > 100 µg/mL).

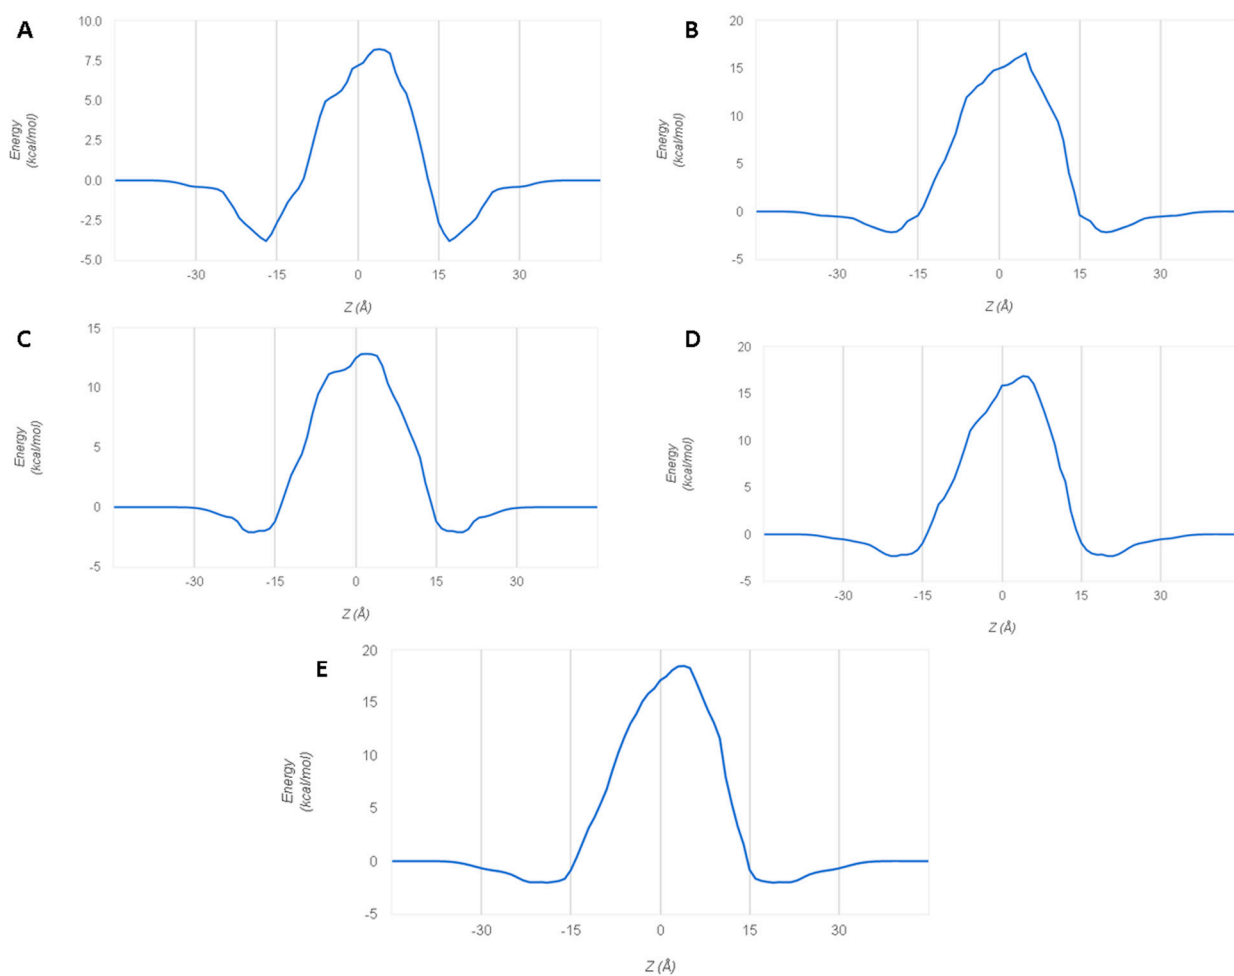

**Figure S1.** Transfer energies of CBE's top-scoring compound across the membrane bilayer (DOPC bilayer): (A) cnicin, (B) nortracheloside, (C) arctiin, (D) apigenin 7-O-glucoside, (E) astragalinal.

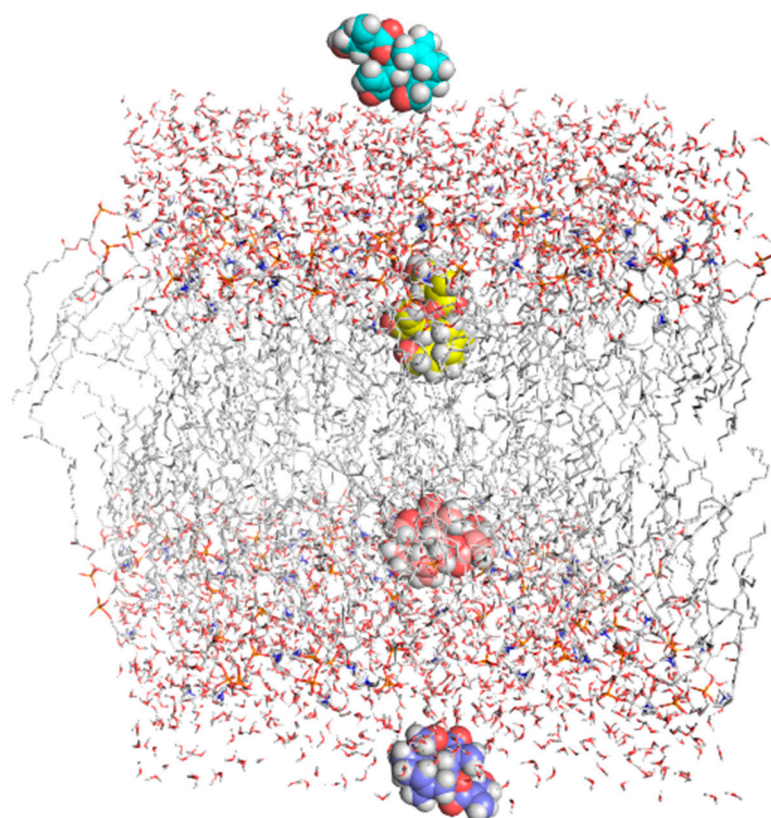

**Figure S2.** Cnicin positions during its transfer across the lipid bilayer.
